# Supplementary material for: Crystal violet-modified Fe3O4@Au SERS probes: a novel highly sensitive method for H2 detection
Source: Royal Society of Chemistry journal article supplement (doi:10.1039/d4nr01690d), 2024-01-01
Supplement: d4nr01690d1.pdf [file d4nr01690d1.pdf]

## **Crystal violet-modified Fe<sub>3</sub>O<sub>4</sub>@Au SERS probes: A novel highly sensitive method for H<sub>2</sub> detection**

*Dan Xie<sup>a</sup>, Youyou Deng<sup>a</sup>, Xunlong Ji<sup>a</sup>, Yiyan Zhang<sup>a</sup>, Wentao Zhang<sup>a</sup>, Zijin Hong<sup>a</sup>, Wenjing Liu<sup>b</sup>, Jingjing Du<sup>c</sup>, Zhenli Sun<sup>\*a</sup>*

a. College of Environmental Science and Engineering, North China Electric Power University, Beijing 102206, China.

\*Email: sunzhenli1988@163.com

b. State Key Laboratory of Environmental Chemistry and Ecotoxicology, Research Center for Eco Environmental Sciences, Chinese Academy of Sciences, Beijing 100085, China.

c. Key Laboratory for Environmental Factors Control of Agro-product Quality Safety, Ministry of Agriculture and Rural Affairs, Agro-Environmental Protection Institute, Ministry of Agriculture and Rural Affairs, Tianjin 300191, China.

## Calculating the molecular density of CV-modified FA substrate surface:

### (a) CV molecule on each FA microsphere

According to UV-vis experiment (Figure 2-e), the amount of CV molecular functionalized on 1 mL FA substrate was

$$N_{AM} = C_{CV} \times V_{CV} \approx (100.0 - 2.7) \times 10^{-6} \times 1 \times 10^{-3} \times 6.02 \times 10^{23} \approx 5.9 \times 10^{16}$$

There are 30mg  $\text{Fe}_3\text{O}_4@\text{SiO}_2$  (FS) in 1 mL FA substrate, the amount of FS was

$$N_{FS} = \frac{m_{FS}}{M_{FS}} = \frac{30 \times 10^{-3}}{2.2 \times \frac{4\pi}{3} ((153 \times 10^{-7})^3 - (150 \times 10^{-7})^3) + 5.18 \times \frac{4\pi}{3} (150 \times 10^{-7})^3} \approx 4.0 \times 10^{11}$$

At the time of detection, the amount of 4 $\mu\text{L}$  FA particles on the silicon wafer is:

$$N_{FA} = 4.0 \times 10^{11} \times \frac{4 \times 10^{-3}}{3} \approx 5.3 \times 10^8$$

The amount of CV molecule functionalized on each FA sphere was

$$N_{CV} = \frac{N_{AM}}{N_{FA}} = \frac{5.9 \times 10^{16}}{5.3 \times 10^8} \approx 1.1 \times 10^8$$

### (b) Surface area of each FA microsphere

$$N_{Au} \approx \frac{4\pi}{\Phi} \approx \frac{4\pi \times \left(R + r + \frac{space}{2}\right)^2}{\pi \times \left(r + \frac{space}{2}\right)^2} = \frac{4\pi \times \left(155 + 10 + \frac{7}{2}\right)^2}{\pi \times \left(10 + \frac{7}{2}\right)^2} \approx 587$$

$$S_{FA} = S_{FA} + S_{Au} \times N_{Au} = 4\pi R^2 + 4\pi r^2 \times 587 = 4\pi 155^2 + 4\pi 10^2 \times 587 \approx 1.08 \times 10^6$$

Where  $\Phi$  represents the deflection angle, Gap is distance between Au NPs, R is the radii of the FS NP, r is the radii of the Au NP (Figure 1-b). Here, Gap, R and r are experimentally determined as Gap=7 nm, R=155 nm and r =10 nm. Based on these parameters, we obtained that the amount of Au NPs bound to an FS sphere is about 587. Then surface area of each FA microsphere is about  $1.08 \times 10^6$ .

### (c) CV density on FA surface

$$D_{AM} = \frac{N_{CV}}{S_{FA}} \approx \frac{1.1 \times 10^8}{1.08 \times 10^6} \approx 102 \text{ per nm}^2$$

The CV molecule density functionalized on each FA sphere can be estimated to be about 102 per  $\text{nm}^2$ .

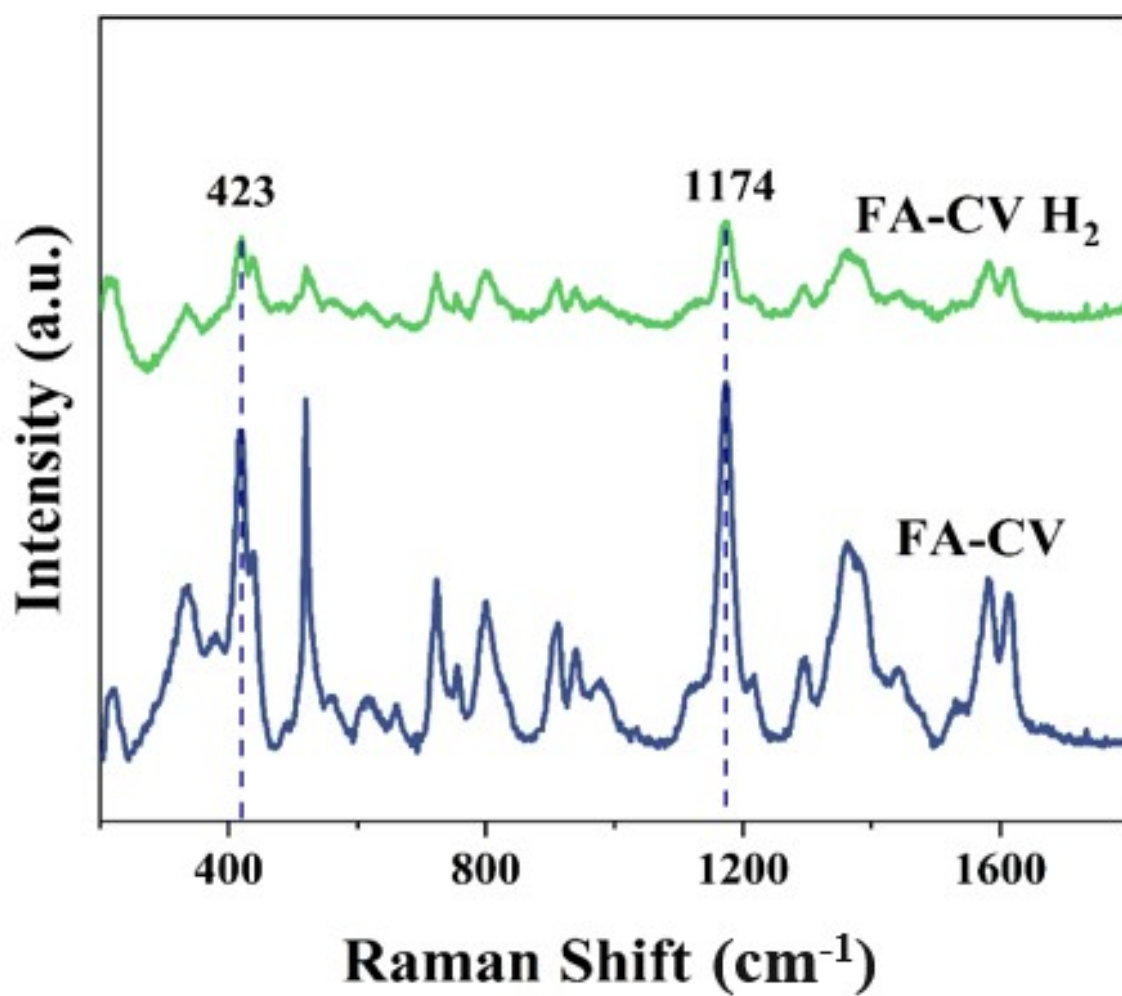

Figure S1 SERS spectra of FA-CV and FA-CV after exposure to H<sub>2</sub>.

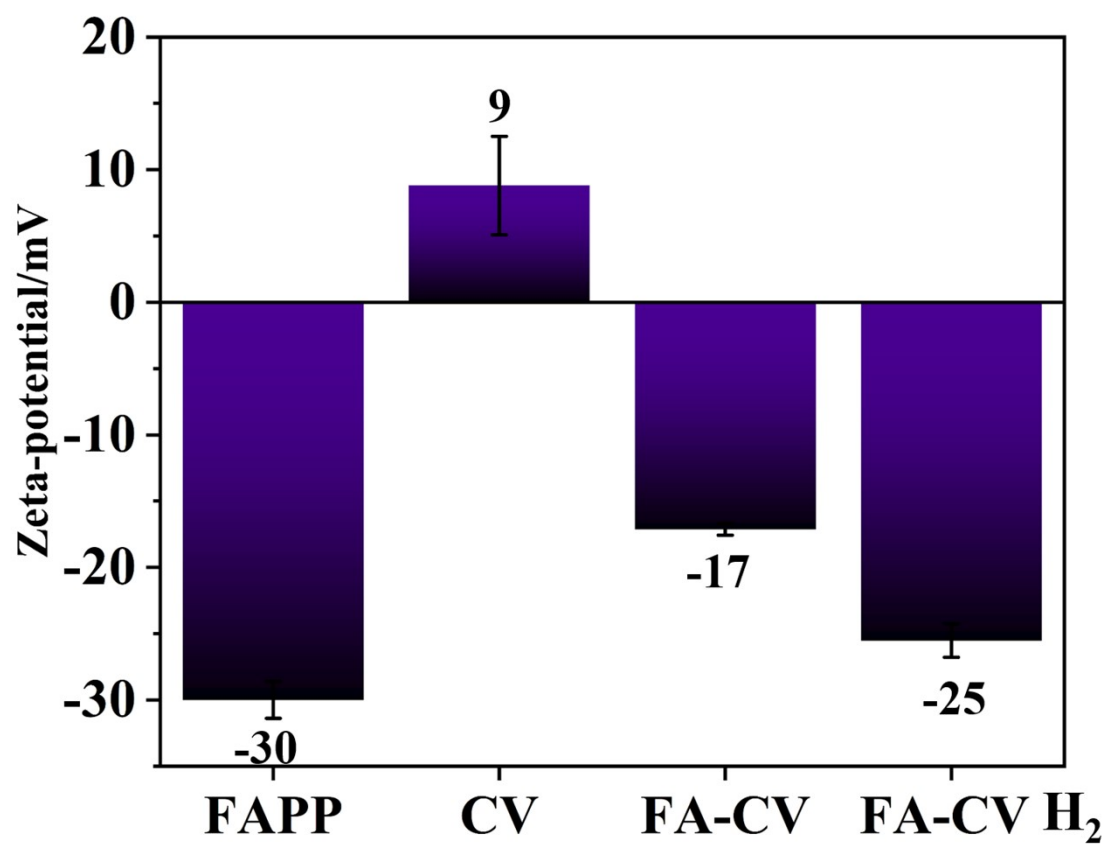

Figure S2. Zeta potential measurements for FAPP, CV, FA-CV and FA-CV passes H<sub>2</sub>.

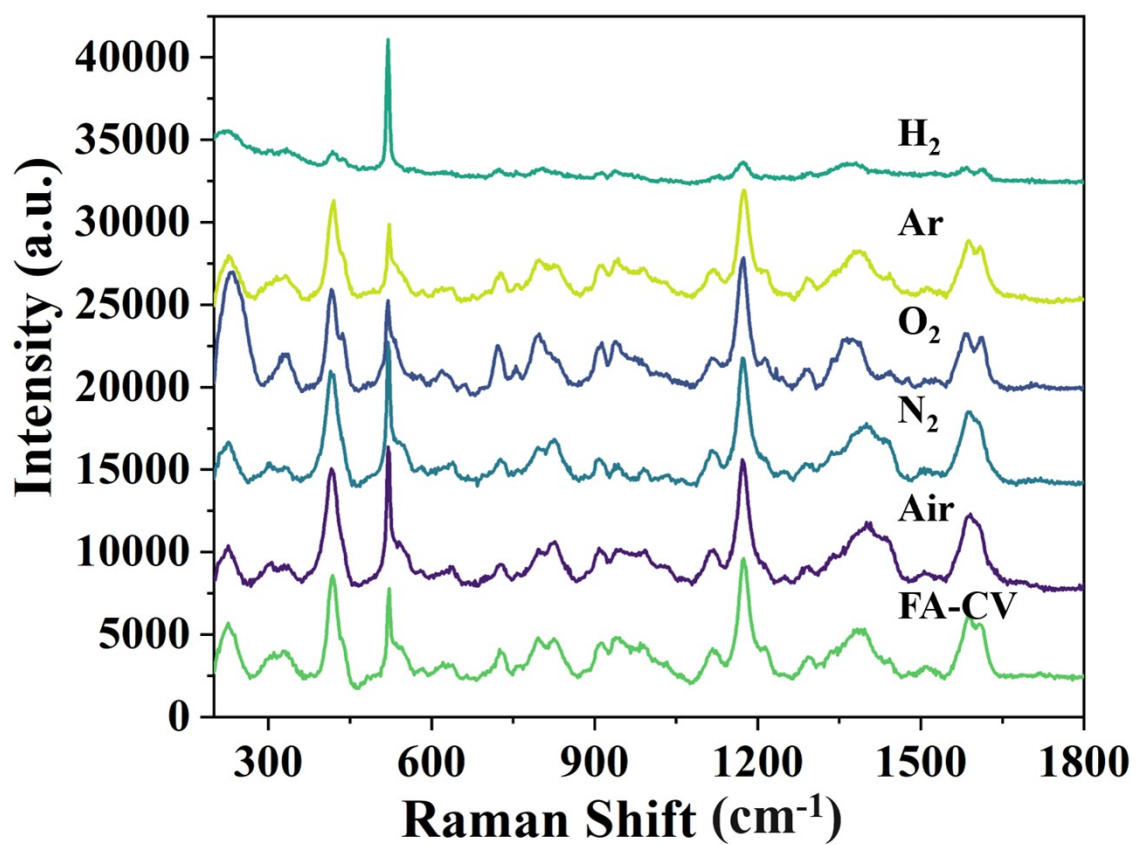

Figure S3 Raman spectra of FA-CV substrate under  $\text{N}_2$ , Ar, air,  $\text{O}_2$  and  $\text{H}_2$  ambient conditions.
